# Supplementary material
Source: publisher figshare collection journal article supplement (https://acs.figshare.com/ndownloader/files/5672769)
Supplement: Supplementary file 1 [file 5672769]

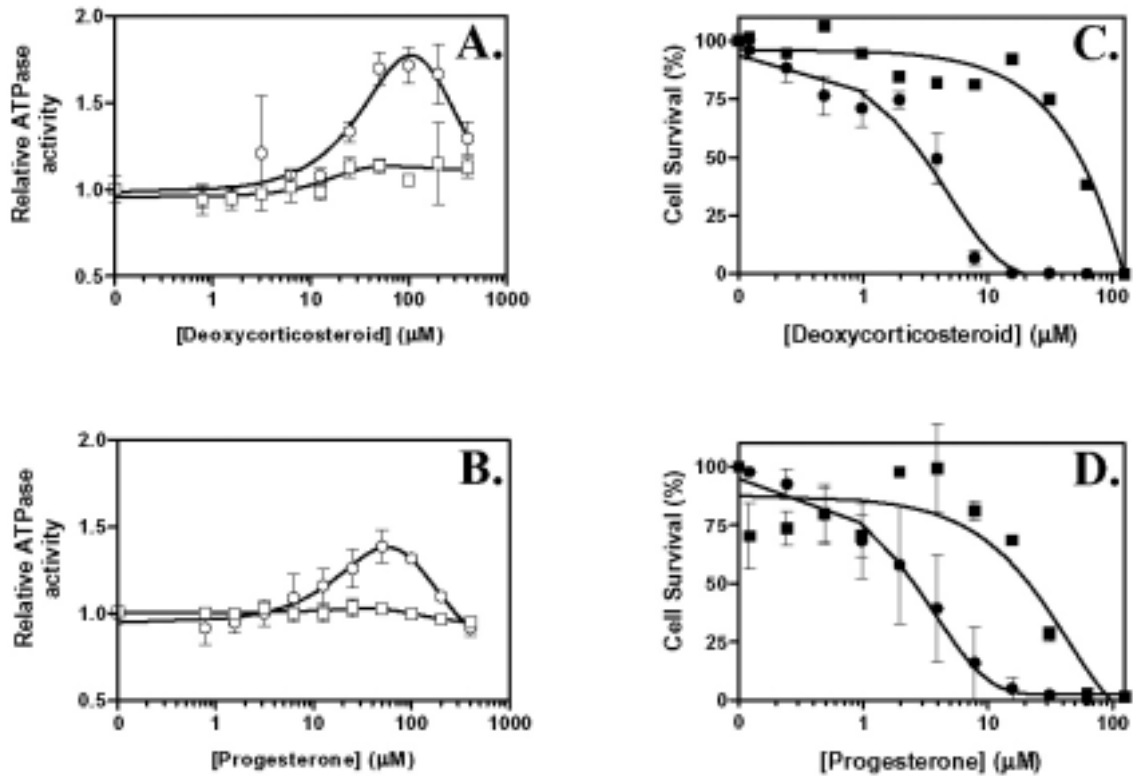

**Supplemental Figure 1.** Effects of deoxycorticosteroid and progesterone on cell survival and P-gp1 ATPase in AUXB1 and CH<sup>R</sup>C5. [A and B] ATPase activity of AUXB1 (white squares) and CH<sup>R</sup>C5 (white circles) was measured using purified plasma membranes exposed to increasing concentrations of deoxycorticosteroid and progesterone. [C and D] Survival of AUXB1 (black squares) and CH<sup>R</sup>C5 (black circles) exposed to increasing concentrations of deoxycorticosteroid and progesterone was determined by staining colonies with methylene blue and quantified by spectrophotometry.
